# Supplementary material
Source: publisher figshare collection journal article supplement (https://acs.figshare.com/ndownloader/files/3954049)
Supplement: Supplementary file 1 [file 3954049]

## Supporting Information

### Atomic Force Microscopic Study of Chitinase Binding onto Chitin and Cellulose Surfaces

Yoshihiro Kikkawa,<sup>†,\*</sup> Masato Fukuda,<sup>‡</sup> Tomoya Kimura,<sup>‡</sup> Ayumi Kashiwada,<sup>‡</sup>  
Kiyomi Matsuda,<sup>‡</sup> Masatoshi Kaneshato,<sup>†</sup> Masahisa Wada,<sup>§,||</sup> Tadayuki Imanaka,<sup>⊥</sup> and  
Takeshi Tanaka<sup>†,\*</sup>

<sup>†</sup>National Institute of Advanced Industrial Science and Technology (AIST), Tsukuba Central  
4, 1-1-1 Higashi, Tsukuba, Ibaraki 305-8562, Japan

<sup>‡</sup>Department of Applied Molecular Chemistry, College of Industrial Technology, Nihon  
University, 1-2-1 Izumi-cho, Narashino, Chiba 275-8575, Japan

<sup>§</sup>Department of Biomaterials Science, Graduate School of Agricultural and Life Sciences, The  
University of Tokyo, Tokyo 113-8657, Japan

<sup>||</sup>Department of Plant & Environmental New Resources, College of Life Sciences, Kyung Hee  
University, 1, Seocheon-dong, Giheung-ku, Yongin-si, Gyeonggi-do 446-701, Republic of  
Korea

<sup>⊥</sup>Department of Biotechnology, College of Life Sciences, Ritsumeikan University, Kusatsu,  
Shiga 525-8577, Japan

## 1. Binding Force Analyses of ChBD2 onto Chitin/Cellulose Surfaces

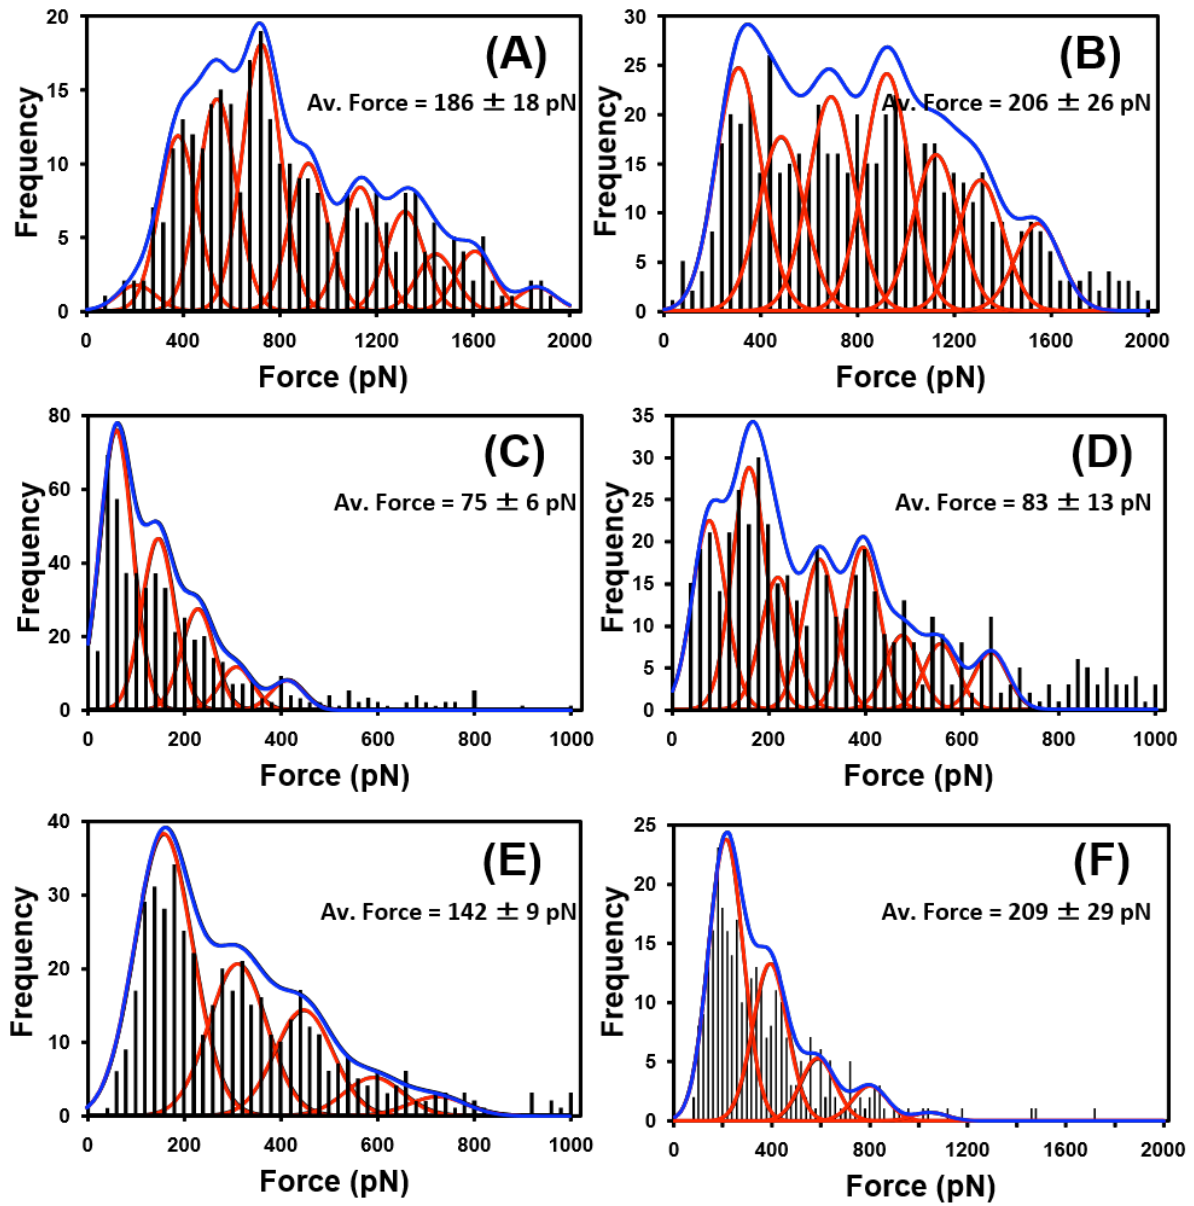

**Figure S1** Histogram Analyses of rupture forces between ChBD2 and chitin (A, B)/cellulose (C–F) surfaces at different loading rates: (A) 38 nN/s; (B) 120 nN/s; (C) 1 nN/s; (D) 2 nN/s; (E) 9 nN/s; (F) 120 nN/s. The blue and red curves are corresponding to the FFT-smoothed and following Gaussian fitted data, respectively.

## 2. Binding Force Analyses of ChBD1 onto Chitin/Cellulose Surfaces

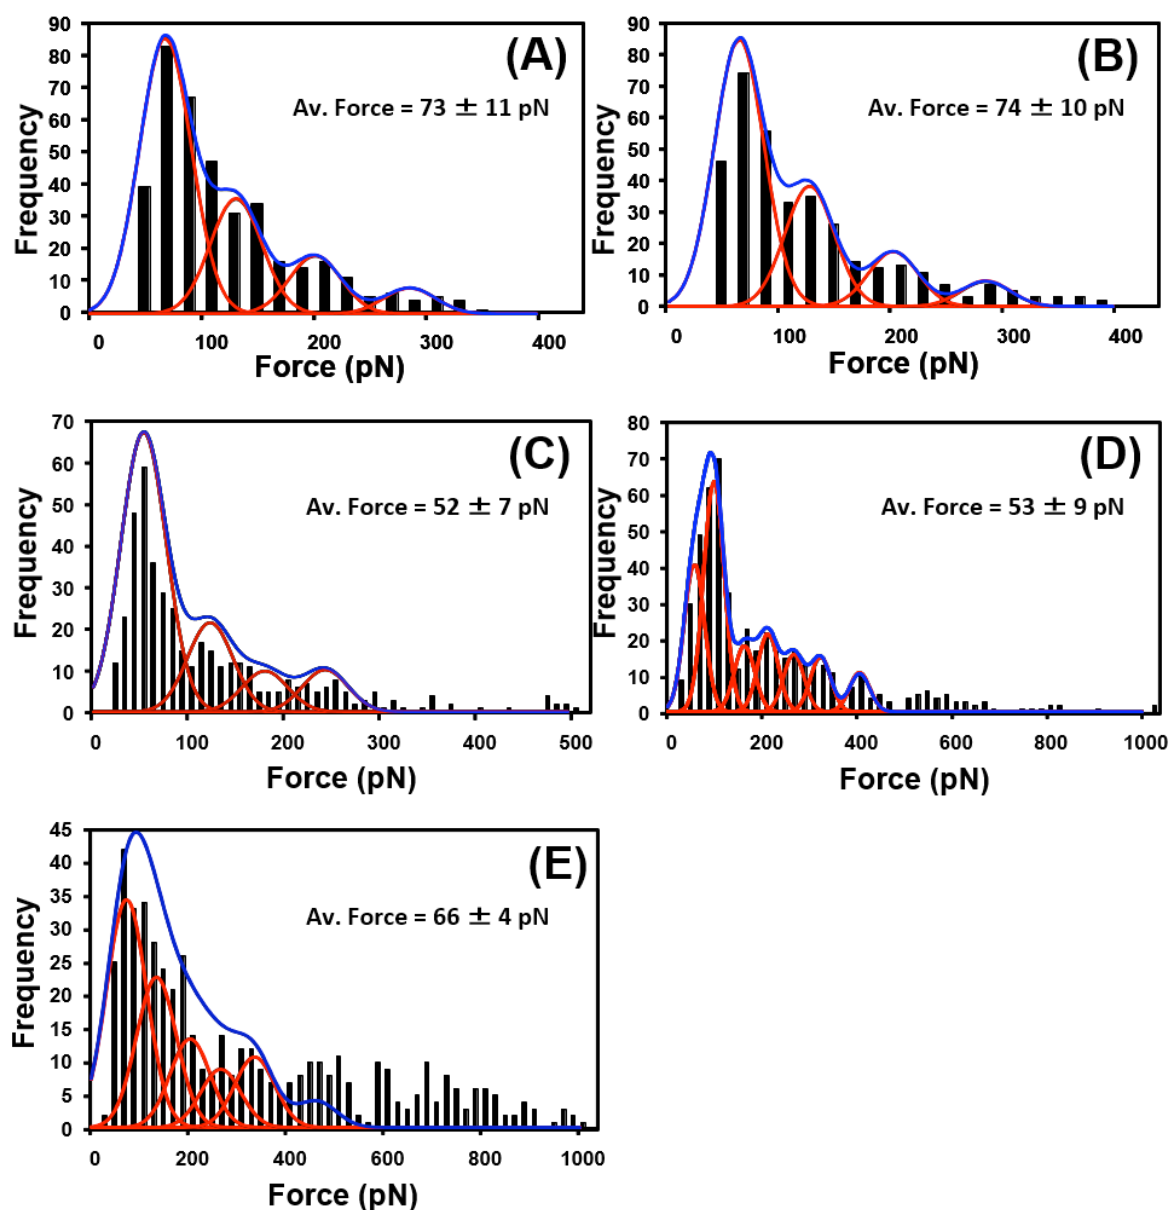

**Figure S2** Histogram Analyses of rupture forces between ChBD1 and chitin (A, B)/cellulose (C–E) surfaces at different loading rates: (A) 9 nN/s; (B) 90 nN/s; (C) 2 nN/s; (D) 15 nN/s; (E) 77 nN/s. The blue and red curves are corresponding to the FFT-smoothed and following Gaussian fitted data, respectively.
